# Supplementary material
Source: ML conference proceedings conference paper supplement (https://openreview.net/forum?id=EPKmSgXvRe)

LMABO

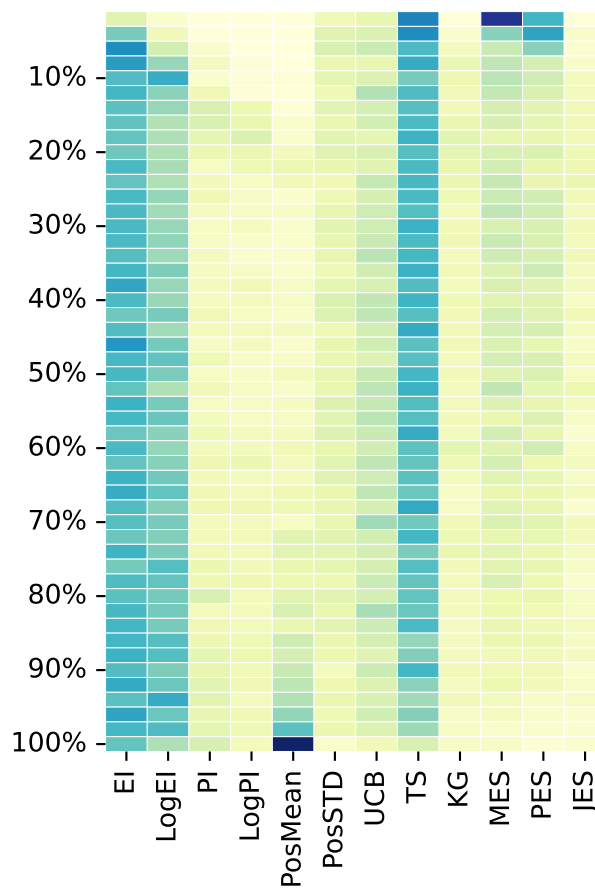

GP-Hedge

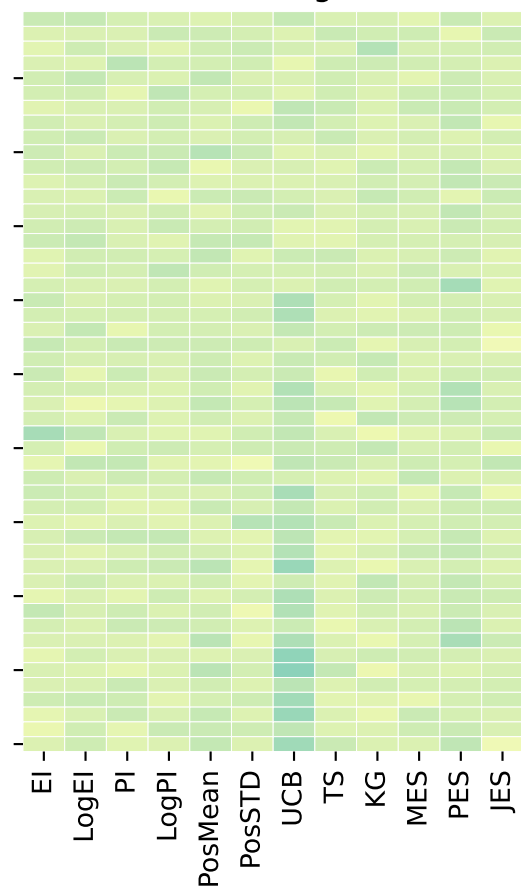

No-PASt-BO

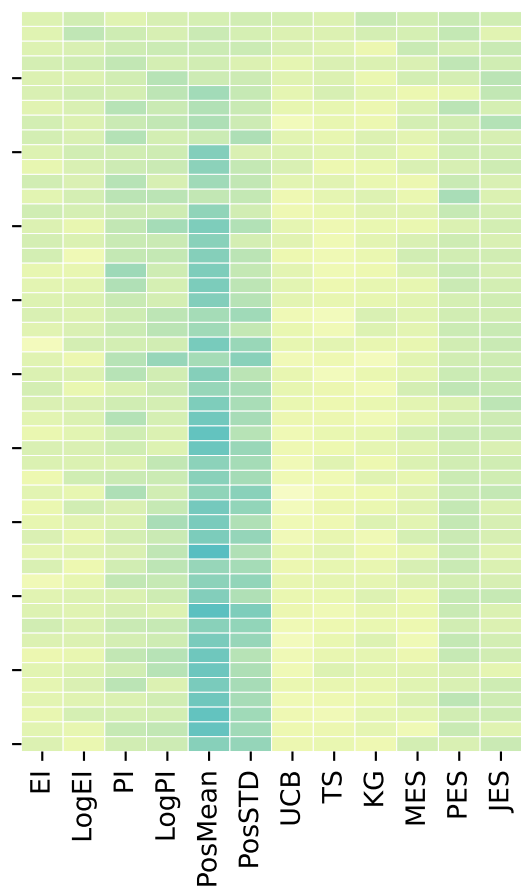

SETUP-BO

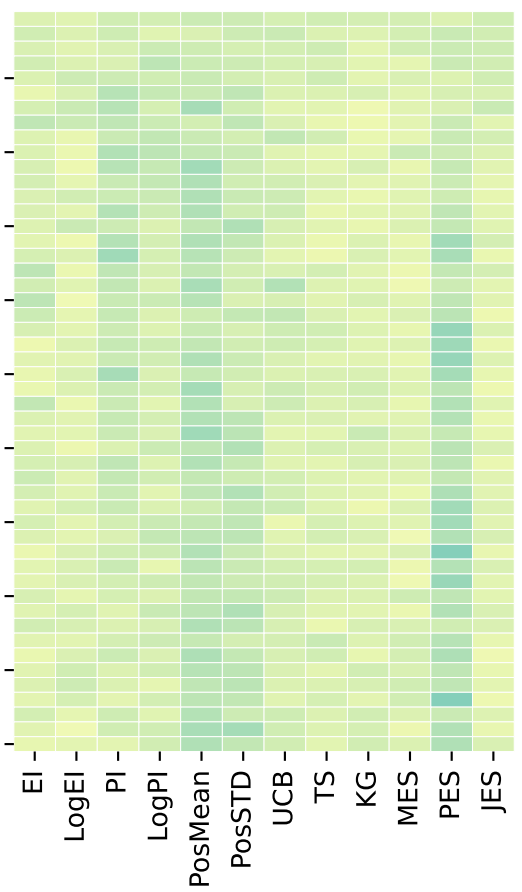

ESP

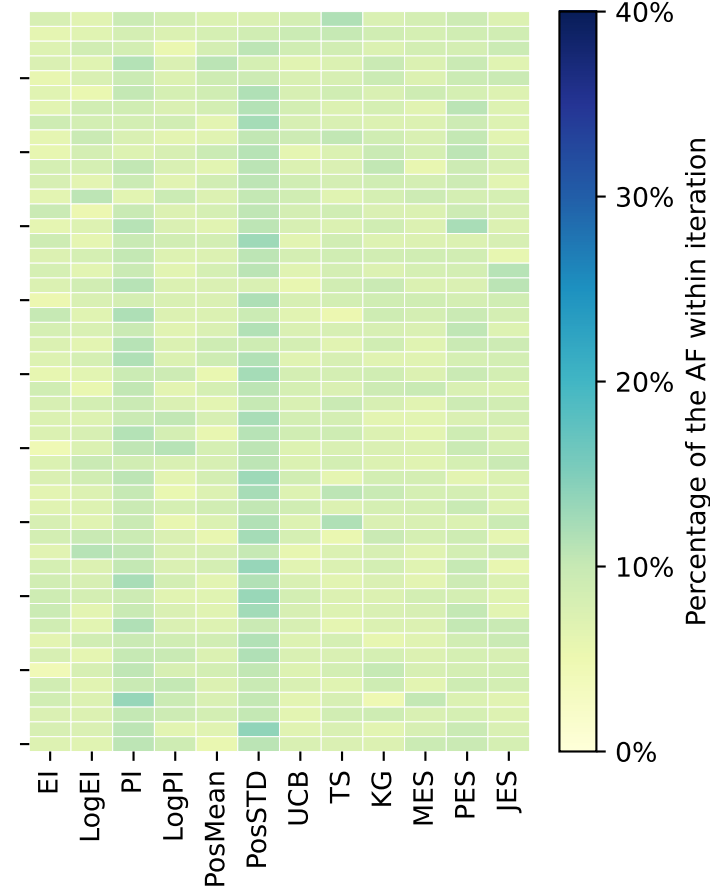

Supplement: supplementary_material [file af_count_by_iteration_comparison.pdf › lmabo-supp/figures/paper_figures/af_count_by_iteration_comparison.pdf]

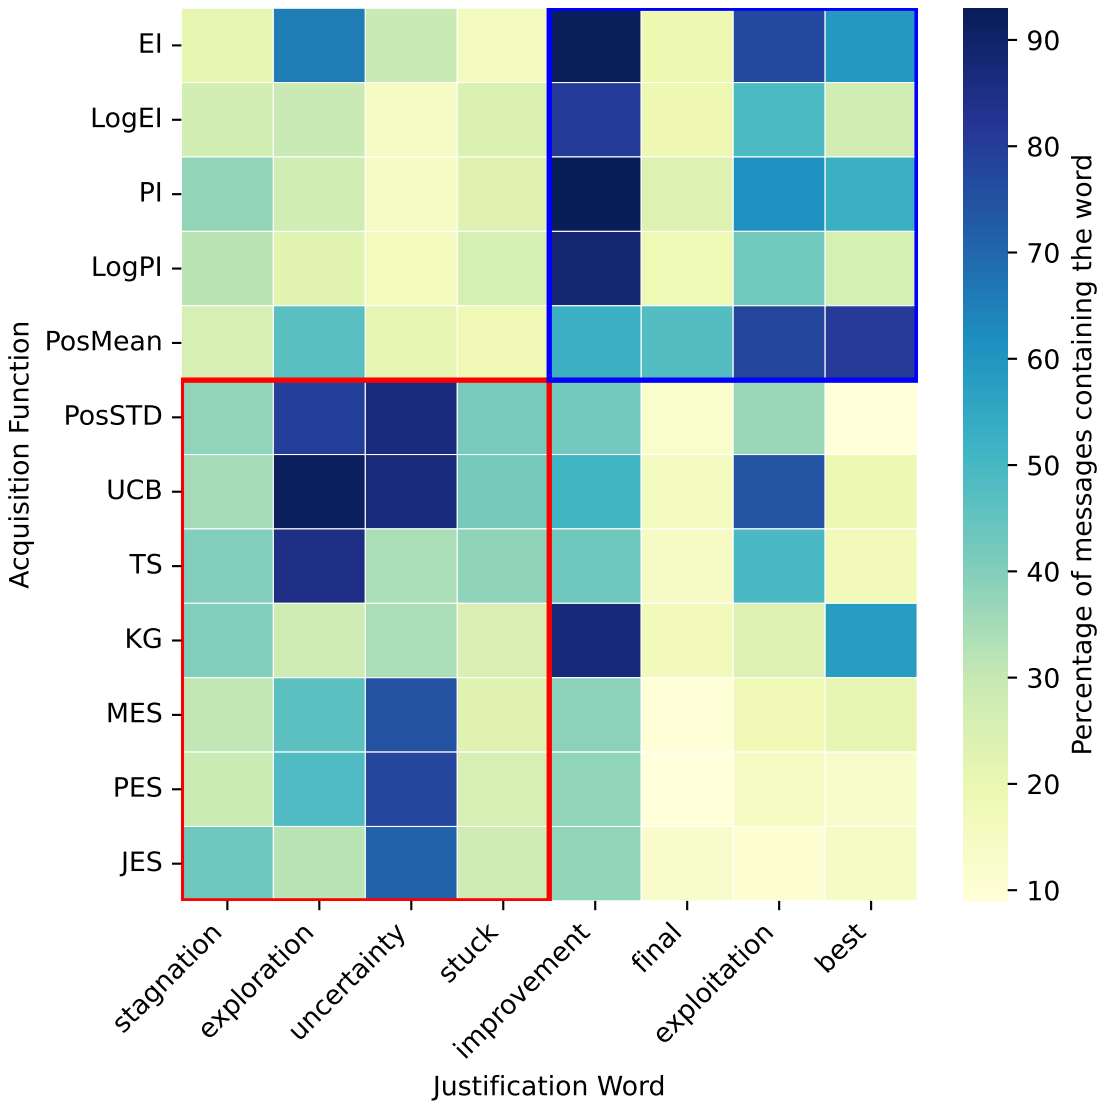

Supplement: supplementary_material [file af_justification_word_heatmap.pdf › lmabo-supp/figures/paper_figures/af_justification_word_heatmap.pdf]

Ackley

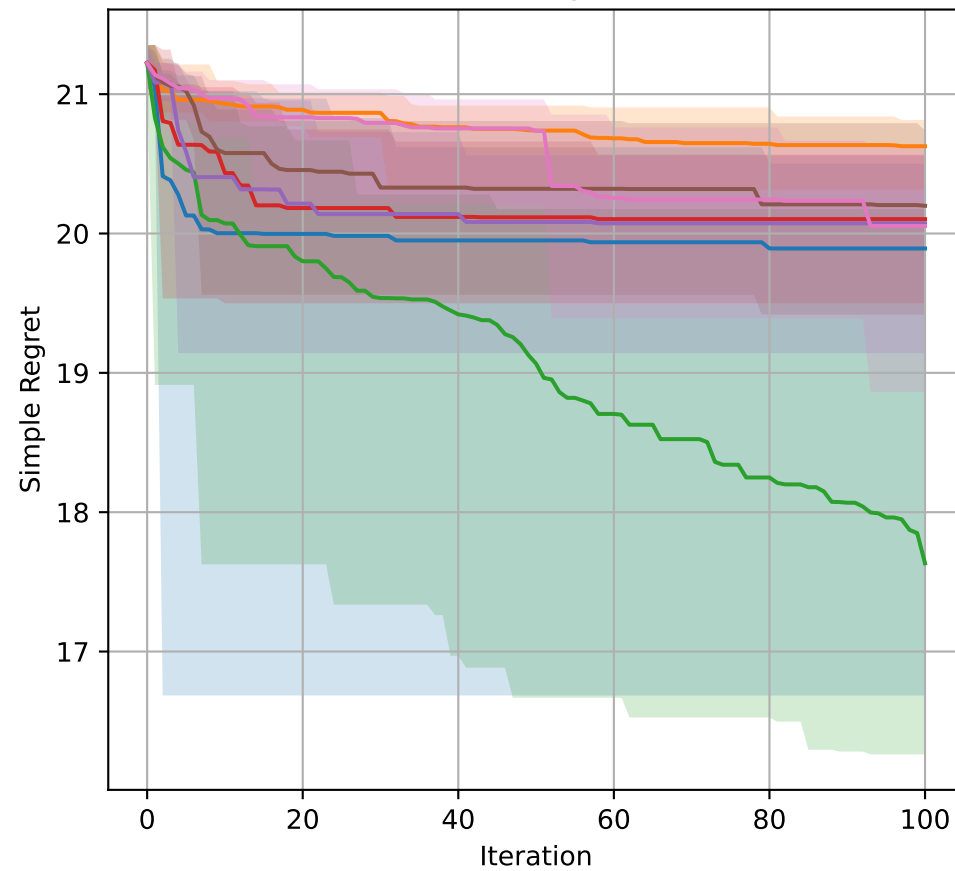

Cosine8

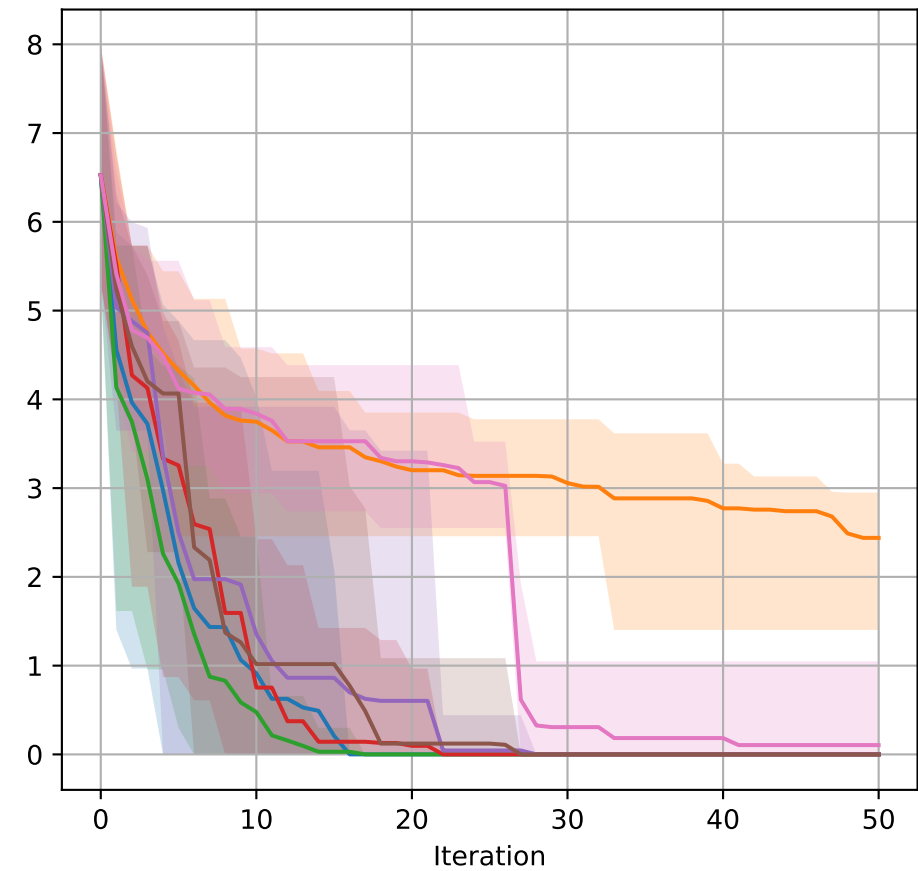

Gallagher101

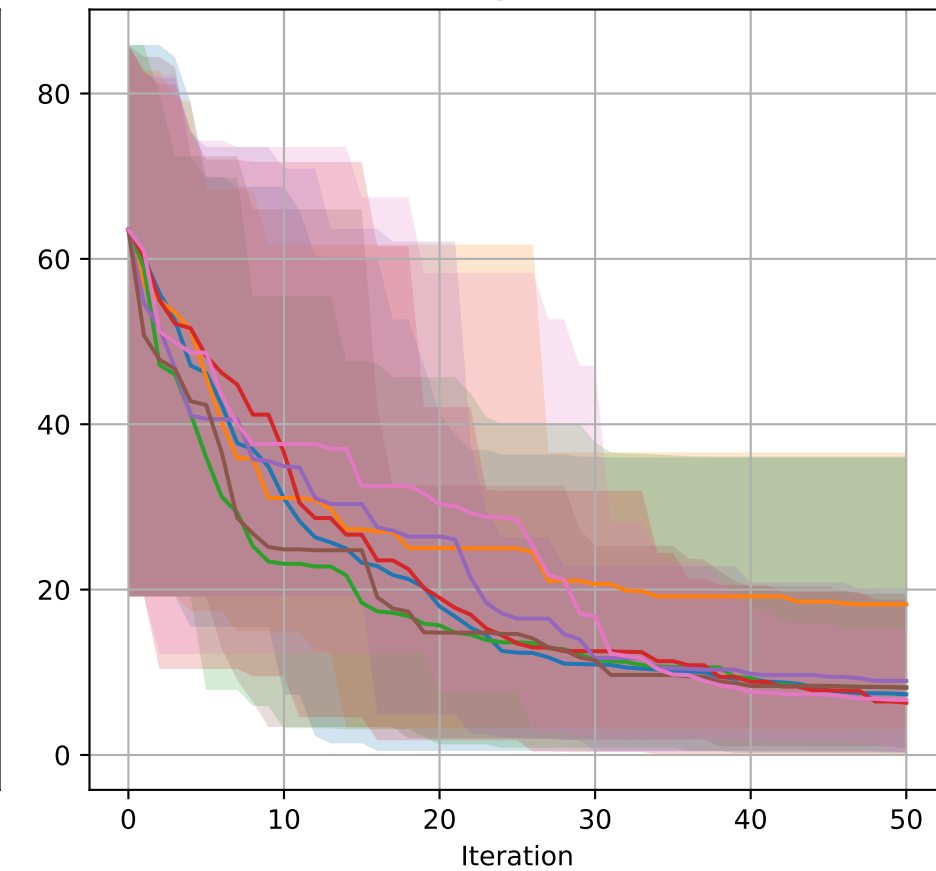

hpt\_digits\_RandomForest

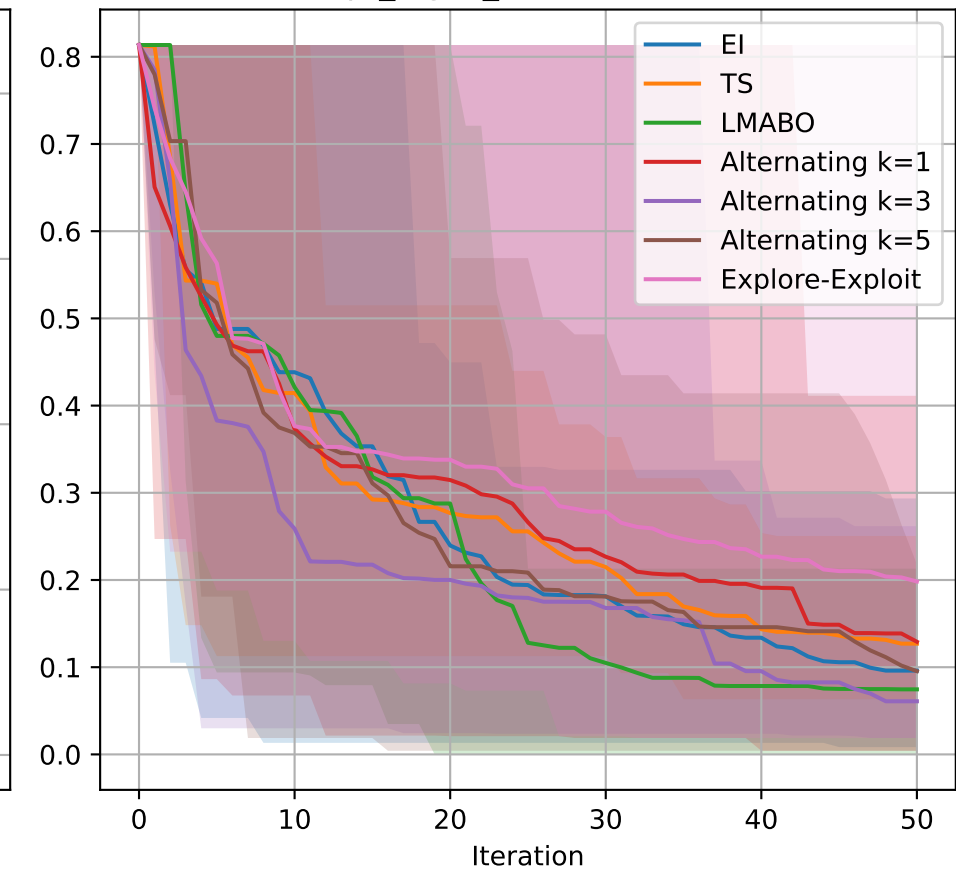

Supplement: supplementary_material [file meta_strategies_comparison.pdf › lmabo-supp/figures/paper_figures/meta_strategies_comparison.pdf]

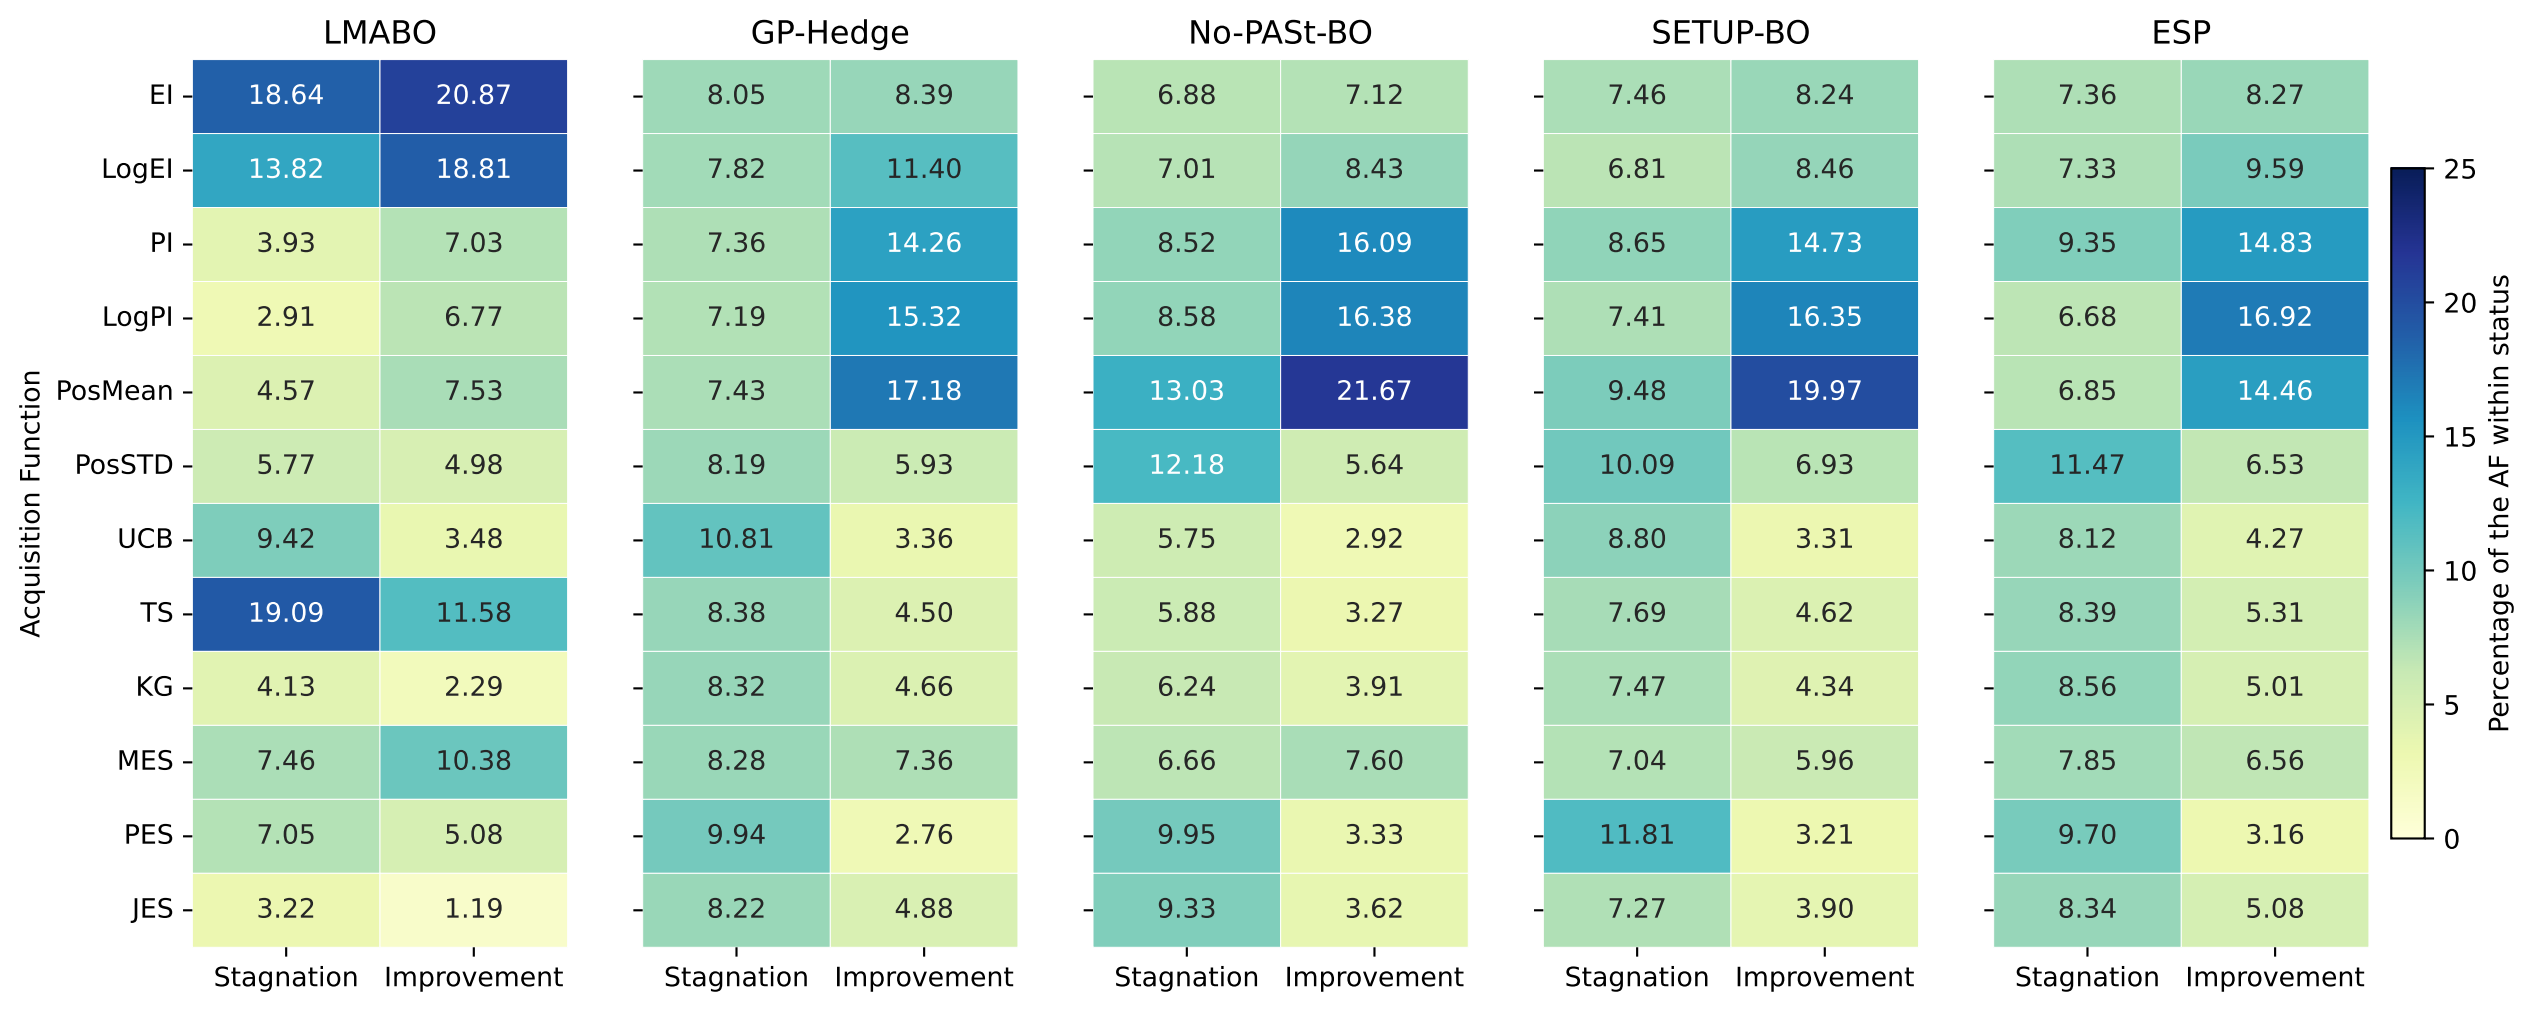

Supplement: supplementary_material [file stagnation_improvement_comparison.pdf › lmabo-supp/figures/paper_figures/stagnation_improvement_comparison.pdf]
